# Supplementary material for: Complex Analysis of Antioxidant Activity, Abscisic Acid Level, and Accumulation of Osmotica in Apple and Cherry In Vitro Cultures under Osmotic Stress
Source: MDPI journal article supplement (doi:10.3390/ijms22157922), 2021-07-25
Supplement: s1 [file s1]

**Table S1.** Effect of different concentration of PEG 6000 on sugars of in vitro culture of five apple cultivars. Data are means  $\pm$  SDs. Values within column, followed by the same letter(s), are not significantly different according to Tukey's test ( $p < 0.05$ ).

| Cultivar                   | PEG Concentration (g·L <sup>-1</sup> ) | Glucose (mg·g <sup>-1</sup> FW) | Fructose (mg·g <sup>-1</sup> FW) | Glycerol (mg·g <sup>-1</sup> FW) | Sorbitol (mg·g <sup>-1</sup> FW) | Sucrose (mg·g <sup>-1</sup> FW) |
|----------------------------|----------------------------------------|---------------------------------|----------------------------------|----------------------------------|----------------------------------|---------------------------------|
| <i>Malinové Holovouské</i> | 0                                      | 1.28 $\pm$ 0.04 i               | 0.66 $\pm$ 0.03 p                | 0.024 $\pm$ 0.003 ef             | 1.24 $\pm$ 0.08 j                | 1.23 $\pm$ 0.10 ijkl            |
|                            | 5                                      | 2.10 $\pm$ 0.19 de              | 2.04 $\pm$ 0.10 fg               | 0.057 $\pm$ 0.005 bc             | 2.18 $\pm$ 0.26 f                | 2.63 $\pm$ 0.02 b               |
|                            | 10                                     | 1.60 $\pm$ 0.04 gh              | 1.79 $\pm$ 0.01 hi               | 0.043 $\pm$ 0.010 cd             | 2.78 $\pm$ 0.04 e                | 2.24 $\pm$ 0.07 cd              |
|                            | 25                                     | 1.88 $\pm$ 0.08 ef              | 0.87 $\pm$ 0.04 mno              | 0.090 $\pm$ 0.009 a              | 1.67 $\pm$ 0.04 ghi              | 2.24 $\pm$ 0.10 cd              |
|                            | 50                                     | 1.42 $\pm$ 0.05 hi              | 0.93 $\pm$ 0.02 lmn              | 0.058 $\pm$ 0.004 bc             | 1.51 $\pm$ 0.06 hij              | 2.65 $\pm$ 0.04 b               |
| <i>Fragrance</i>           | 0                                      | 1.27 $\pm$ 0.07 i               | 0.83 $\pm$ 0.01 nop              | 0.027 $\pm$ 0.001 ef             | 1.20 $\pm$ 0.09 j                | 1.36 $\pm$ 0.04 ij              |
|                            | 5                                      | 2.11 $\pm$ 0.05 de              | 2.18 $\pm$ 0.03 fg               | 0.067 $\pm$ 0.011 b              | 3.12 $\pm$ 0.06 de               | 2.01 $\pm$ 0.07 def             |
|                            | 10                                     | 1.82 $\pm$ 0.08 fg              | 1.49 $\pm$ 0.05 j                | 0.033 $\pm$ 0.000 def            | 1.83 $\pm$ 0.01 gh               | 1.72 $\pm$ 0.03 g               |
|                            | 25                                     | 1.57 $\pm$ 0.05 gh              | 0.94 $\pm$ 0.04 lmn              | 0.033 $\pm$ 0.000 def            | 2.27 $\pm$ 0.03 f                | 1.73 $\pm$ 0.04 g               |
|                            | 50                                     | 1.63 $\pm$ 0.04 fgh             | 1.08 $\pm$ 0.03 l                | 0.043 $\pm$ 0.002 cd             | 1.84 $\pm$ 0.04 gh               | 1.44 $\pm$ 0.03 hi              |
| <i>Rubinstep</i>           | 0                                      | 1.64 $\pm$ 0.03 fgh             | 1.28 $\pm$ 0.04 k                | 0.025 $\pm$ 0.002 ef             | 1.41 $\pm$ 0.03 ij               | 1.28 $\pm$ 0.08 ijk             |
|                            | 5                                      | 3.48 $\pm$ 0.08 a               | 3.68 $\pm$ 0.10 b                | 0.037 $\pm$ 0.001 def            | 4.64 $\pm$ 0.33 ab               | 2.51 $\pm$ 0.04 b               |
|                            | 10                                     | 1.82 $\pm$ 0.08 a               | 4.02 $\pm$ 0.05 a                | 0.057 $\pm$ 0.006 bc             | 4.78 $\pm$ 0.09 a                | 2.98 $\pm$ 0.18 a               |
|                            | 25                                     | 1.57 $\pm$ 0.02 de              | 1.77 $\pm$ 0.01 hi               | 0.056 $\pm$ 0.001 bc             | 2.91 $\pm$ 0.11 de               | 2.48 $\pm$ 0.07 bc              |
|                            | 50                                     | 1.63 $\pm$ 0.07 d               | 1.73 $\pm$ 0.04 i                | 0.066 $\pm$ 0.008 b              | 1.62 $\pm$ 0.06 ghi              | 1.75 $\pm$ 0.02 g               |
| <i>Idared</i>              | 0                                      | 1.50 $\pm$ 0.14 hi              | 0.68 $\pm$ 0.02 op               | 0.028 $\pm$ 0.004 def            | 1.44 $\pm$ 0.08 ij               | 1.01 $\pm$ 0.08 l               |
|                            | 5                                      | 2.77 $\pm$ 0.15 c               | 3.29 $\pm$ 0.10 c                | 0.035 $\pm$ 0.005 def            | 4.39 $\pm$ 0.05 b                | 1.69 $\pm$ 0.14 gh              |
|                            | 10                                     | 1.58 $\pm$ 0.03 gh              | 1.93 $\pm$ 0.09 gh               | 0.043 $\pm$ 0.002 cd             | 3.61 $\pm$ 0.10 c                | 1.69 $\pm$ 0.10 g               |
|                            | 25                                     | 1.61 $\pm$ 0.02 gh              | 1.03 $\pm$ 0.06 lm               | 0.056 $\pm$ 0.004 bc             | 3.07 $\pm$ 0.06 de               | 1.80 $\pm$ 0.07 fg              |
|                            | 50                                     | 1.65 $\pm$ 0.02 fgh             | 1.02 $\pm$ 0.05 lm               | 0.038 $\pm$ 0.007 de             | 1.96 $\pm$ 0.04 fg               | 1.15 $\pm$ 0.07 jkl             |
| <i>CAR Alexander</i>       | 0                                      | 1.82 $\pm$ 0.08 fg              | 0.93 $\pm$ 0.02 lmn              | 0.022 $\pm$ 0.002 f              | 1.47 $\pm$ 0.14 ij               | 1.04 $\pm$ 0.07 kl              |
|                            | 5                                      | 3.17 $\pm$ 0.03 b               | 2.77 $\pm$ 0.06 d                | 0.025 $\pm$ 0.001 ef             | 4.72 $\pm$ 0.09 ab               | 2.42 $\pm$ 0.07 bc              |
|                            | 10                                     | 2.23 $\pm$ 0.03 d               | 2.38 $\pm$ 0.07 e                | 0.043 $\pm$ 0.004 cd             | 3.72 $\pm$ 0.05 c                | 2.09 $\pm$ 0.06 de              |
|                            | 25                                     | 2.21 $\pm$ 0.10 d               | 1.04 $\pm$ 0.05 lm               | 0.038 $\pm$ 0.004 de             | 3.13 $\pm$ 0.08 d                | 1.78 $\pm$ 0.08 fg              |
|                            | 50                                     | 2.14 $\pm$ 0.05 d               | 1.29 $\pm$ 0.07 k                | 0.031 $\pm$ 0.001 def            | 1.94 $\pm$ 0.05 fg               | 1.87 $\pm$ 0.05 efg             |

**Table S2.** Effect of different concentration of PEG 6000 on sugars of *in vitro* culture of five cherry cultivars. Data are means  $\pm$  SDs. Values within column, followed by the same letter(s), are not significantly different according to Tukey's test ( $P < 0.05$ ).

| Cultivar           | PEG Concentration (g·L <sup>-1</sup> ) | Glucose (mg·g <sup>-1</sup> FW) | Fructose (mg·g <sup>-1</sup> FW) | Glycerol (mg·g <sup>-1</sup> FW) | Sorbitol (mg·g <sup>-1</sup> FW) | Sucrose (mg·g <sup>-1</sup> FW) |
|--------------------|----------------------------------------|---------------------------------|----------------------------------|----------------------------------|----------------------------------|---------------------------------|
| <i>Regina</i>      | 0                                      | 3.53 $\pm$ 0.07 efg             | 1.28 $\pm$ 0.02 l                | 0.030 $\pm$ 0.001 fghijk         | 1.98 $\pm$ 0.05 jkl              | 1.98 $\pm$ 0.10 jkl             |
|                    | 5                                      | 4.52 $\pm$ 0.10 d               | 4.22 $\pm$ 0.16 bc               | 0.045 $\pm$ 0.005 cd             | 5.71 $\pm$ 0.14 a                | 4.18 $\pm$ 0.05 b               |
|                    | 10                                     | 4.52 $\pm$ 0.02 d               | 4.06 $\pm$ 0.15 bcd              | 0.036 $\pm$ 0.003 defgh          | 4.22 $\pm$ 0.08 de               | 3.72 $\pm$ 0.09 cd              |
|                    | 25                                     | 3.66 $\pm$ 0.01 ef              | 2.24 $\pm$ 0.09 ijk              | 0.036 $\pm$ 0.001 defghi         | 2.37 $\pm$ 0.11 i                | 2.67 $\pm$ 0.08 f               |
|                    | 50                                     | 3.58 $\pm$ 0.07 ef              | 1.84 $\pm$ 0.10 jk               | 0.038 $\pm$ 0.004 cdefg          | 3.60 $\pm$ 0.10 fg               | 2.44 $\pm$ 0.09 fghi            |
| <i>Napoleonova</i> | 0                                      | 3.44 $\pm$ 0.09 fgh             | 1.10 $\pm$ 0.09 l                | 0.023 $\pm$ 0.002 kl             | 1.21 $\pm$ 0.08 m                | 2.08 $\pm$ 0.07 jkl             |
|                    | 5                                      | 5.56 $\pm$ 0.12 bc              | 3.28 $\pm$ 0.06 fg               | 0.031 $\pm$ 0.002 fghijk         | 3.26 $\pm$ 0.02 gh               | 3.55 $\pm$ 0.05 d               |
|                    | 10                                     | 5.96 $\pm$ 0.19 ab              | 5.04 $\pm$ 0.19 a                | 0.041 $\pm$ 0.001 cde            | 4.70 $\pm$ 0.08 bc               | 3.98 $\pm$ 0.10 bc              |
|                    | 25                                     | 4.71 $\pm$ 0.05 d               | 1.79 $\pm$ 0.05 k                | 0.028 $\pm$ 0.001 hijk           | 3.75 $\pm$ 0.18 f                | 2.65 $\pm$ 0.12 f               |
|                    | 50                                     | 3.46 $\pm$ 0.09 fgh             | 1.39 $\pm$ 0.20 l                | 0.033 $\pm$ 0.002 efghij         | 2.22 $\pm$ 0.25 ij               | 2.44 $\pm$ 0.09 fghi            |
| <i>Kaštánka</i>    | 0                                      | 2.53 $\pm$ 0.17 l               | 1.04 $\pm$ 0.04 l                | 0.026 $\pm$ 0.006 jk             | 1.87 $\pm$ 0.06 jkl              | 2.06 $\pm$ 0.14 jkl             |
|                    | 5                                      | 5.23 $\pm$ 0.21 c               | 3.80 $\pm$ 0.01 de               | 0.067 $\pm$ 0.007 a              | 4.39 $\pm$ 0.08 cde              | 4.51 $\pm$ 0.19 a               |
|                    | 10                                     | 5.69 $\pm$ 0.28 ab              | 4.01 $\pm$ 0.11 cd               | 0.041 $\pm$ 0.002 cde            | 3.81 $\pm$ 0.14 f                | 3.60 $\pm$ 0.11 d               |
|                    | 25                                     | 3.16 $\pm$ 0.10 ghi             | 2.16 $\pm$ 0.05 ijk              | 0.035 $\pm$ 0.003 hijk           | 2.38 $\pm$ 0.11 i                | 2.54 $\pm$ 0.17 fgh             |
|                    | 50                                     | 3.08 $\pm$ 0.10 hij             | 2.38 $\pm$ 0.14 hi               | 0.029 $\pm$ 0.001 efghij         | 2.21 $\pm$ 0.09 ij               | 2.30 $\pm$ 0.11 ghij            |
| <i>Sunburst</i>    | 0                                      | 3.58 $\pm$ 0.07 efg             | 1.09 $\pm$ 0.08 l                | 0.022 $\pm$ 0.004 kl             | 1.65 $\pm$ 0.06 l                | 1.90 $\pm$ 0.07 l               |
|                    | 5                                      | 4.60 $\pm$ 0.25 d               | 3.72 $\pm$ 0.04 de               | 0.045 $\pm$ 0.004 cd             | 3.83 $\pm$ 0.06 f                | 3.01 $\pm$ 0.09 e               |
|                    | 10                                     | 6.08 $\pm$ 0.09 a               | 4.39 $\pm$ 0.17 b                | 0.047 $\pm$ 0.003 bc             | 4.88 $\pm$ 0.20 b                | 3.71 $\pm$ 0.07 cd              |
|                    | 25                                     | 3.90 $\pm$ 0.19 e               | 2.68 $\pm$ 0.09 h                | 0.039 $\pm$ 0.002 cdef           | 3.07 $\pm$ 0.10 h                | 2.45 $\pm$ 0.02 fghi            |
|                    | 50                                     | 3.74 $\pm$ 0.03 ef              | 2.46 $\pm$ 0.09 hi               | 0.033 $\pm$ 0.005 efghij         | 2.21 $\pm$ 0.10 ij               | 2.24 $\pm$ 0.08 hijk            |
| <i>P-HL-C</i>      | 0                                      | 2.47 $\pm$ 0.08 l               | 2.20 $\pm$ 0.05 ij               | 0.016 $\pm$ 0.000 l              | 1.77 $\pm$ 0.11 kl               | 1.47 $\pm$ 0.19 m               |
|                    | 5                                      | 3.76 $\pm$ 0.10 ef              | 3.53 $\pm$ 0.18 ef               | 0.056 $\pm$ 0.002 b              | 4.58 $\pm$ 0.09 bcd              | 2.59 $\pm$ 0.01 fg              |
|                    | 10                                     | 2.69 $\pm$ 0.13 jkl             | 3.15 $\pm$ 0.25 g                | 0.039 $\pm$ 0.002 cdef           | 4.22 $\pm$ 0.11 e                | 2.27 $\pm$ 0.04 ghij            |
|                    | 25                                     | 2.62 $\pm$ 0.04 kl              | 2.23 $\pm$ 0.09 i                | 0.026 $\pm$ 0.001 ijk            | 2.10 $\pm$ 0.07 ijk              | 2.19 $\pm$ 0.13 ijk             |
|                    | 50                                     | 2.97 $\pm$ 0.09 ijk             | 2.24 $\pm$ 0.08 i                | 0.028 $\pm$ 0.002 hijk           | 2.14 $\pm$ 0.09 ij               | 1.93 $\pm$ 0.08 kl              |
